# Supplementary material for: Management and outcome of patients with chronic myeloid leukemia in blast phase in the tyrosine kinase inhibitor era – analysis of the European LeukemiaNet Blast Phase Registry
Source: PubMed Central journal article supplement (PMC11073984; doi:10.1038/s41375-024-02204-y), 2024-03-28
Supplement: 41375_2024_2204_MOESM1_ESM.pdf [file 41375_2024_2204_MOESM1_ESM.pdf]

Supplementary Table 1. TKI availability outside clinical trials in the participating countries

| <b>Country</b> | <b>Chronic phase</b>                                                                  | <b>Blast phase</b>                                                              |
|----------------|---------------------------------------------------------------------------------------|---------------------------------------------------------------------------------|
| Armenia        | From first line: Imatinib                                                             | First line: Imatinib                                                            |
|                | From second line: Nilotinib                                                           | Second line: Nilotinib                                                          |
|                | From third line: Ponatinib                                                            | Third line: Ponatinib                                                           |
|                | Not available: Dasatinib, Bosutinib, Asciminib                                        | Not available: Dasatinib, Bosutinib, Asciminib                                  |
| Austria        | From first: Imatinib, Dasatinib, Nilotinib, Bosutinib                                 | First line: Imatinib, Dasatinib, Nilotinib, Bosutinib                           |
|                | Resistant or intolerant to Dasatinib or Nilotinib: Ponatinib                          | Resistant or intolerant to Dasatinib or Nilotinib: Ponatinib                    |
|                | T315I any line: Ponatinib                                                             | T315I: Ponatinib                                                                |
|                | After two TKI: Asciminib                                                              | After two TKI: Asciminib                                                        |
| Czech Republic | From first line: Imatinib, Dasatinib, Nilotinib                                       | All lines: Imatinib, Dasatinib, Nilotinib, Bosutinib, Ponatinib                 |
|                | From second line and after special permission for health insurance company: Bosutinib |                                                                                 |
|                | From third line: Ponatinib                                                            |                                                                                 |
|                | T315I any line: Ponatinib                                                             |                                                                                 |
|                | From third line and after special permission for health insurance company: Asciminib  |                                                                                 |
| France         | From first line: Imatinib, Nilotinib, Bosutinib                                       | All lines: Imatinib, Dasatinib, Nilotinib, Bosutinib, Ponatinib                 |
|                | From second line: Dasatinib                                                           |                                                                                 |
|                | From third line: Ponatinib, Asciminib (not for T315I)                                 |                                                                                 |
|                | T315I any line: Ponatinib                                                             |                                                                                 |
| Germany        | From first line: Imatinib, Dasatinib, Nilotinib, Bosutinib                            | No previous therapy with TKI: Imatinib, Dasatinib, Bosutinib                    |
|                | From third line: Ponatinib, Asciminib                                                 | Previous therapy with TKI: Imatinib, Dasatinib, Nilotinib, Bosutinib, Ponatinib |
|                | T315I any line: Ponatinib                                                             |                                                                                 |

|                    |                                                                        |                                                                                 |
|--------------------|------------------------------------------------------------------------|---------------------------------------------------------------------------------|
| Italy              | From first line: Imatinib, Dasatinib, Nilotinib, Bosutinib             | From first line: Imatinib                                                       |
|                    | Patients resistant/intolerant to Dasatinib and/or Nilotinib: Ponatinib | Patients resistant/intolerant to Imatinib:Dasatinib                             |
|                    | From third line: Asciminib                                             | Patients resistant/intolerant to at least one TKI: Bosutinib                    |
|                    | T315I any line: Ponatinib                                              | Patients resistant/intolerant to Dasatinib and/or Nilotinib: Ponatinib          |
|                    |                                                                        | T315I any line: Ponatinib                                                       |
| Poland             | From first line: Imatinib                                              | Any line: Imatinib, Dasatinib, Bosutinib, Ponatinib                             |
|                    | From second line: Dasatinib, Nilotinib, Bosutinib                      |                                                                                 |
|                    | From third line: Ponatinib,                                            |                                                                                 |
| Russian Federation | From first line: Imatinib                                              | Any line: Imatinib, Dasatinib                                                   |
|                    | From second line: Dasatinib, Nilotinib, Bosutinib                      |                                                                                 |
|                    | Managed access program: Asciminib                                      |                                                                                 |
| Slovenia           | From first line: Imatinib, Dasatinib, Nilotinib                        | From first line: Imatinib, Dasatinib, Nilotinib                                 |
|                    | From second line: Bosutinib, Ponatinib                                 | From second line: Bosutinib, Ponatinib                                          |
| Spain              | From first line: Imatinib, Dasatinib, Nilotinib, Bosutinib             | No previous therapy with TKI: Imatinib, Dasatinib, Bosutinib                    |
|                    | From third line: Ponatinib, Asciminib                                  | Previous therapy with TKI: Imatinib, Dasatinib, Nilotinib, Bosutinib, Ponatinib |
|                    | T315I any line: Ponatinib                                              | T315I any line: Ponatinib                                                       |
| Sweden             | From first line: Imatinib, Dasatinib, Nilotinib, Bosutinib             | No previous therapy with TKI: Imatinib, Dasatinib, Bosutinib                    |
|                    | From third line: Ponatinib, Asciminib                                  | Previous therapy with TKI: Imatinib, Dasatinib, Nilotinib, Bosutinib, Ponatinib |
|                    | T315I any line: Ponatinib                                              | T315I any line: Ponatinib                                                       |

\* from first line refers only to patients diagnosed with de novo blast phase. Patients whose blast phase is an evolution of a previous chronic phase are automatically considered from second line (according to the number of chronic phase therapies received).

Supplementary Table 2. Characteristics of patients with atypical *BCR::ABL1* transcript

|    | <b><i>BCR::ABL1</i></b> | <b>Age<br/>at onset<br/>of BP<br/>(years)</b> | <b>Phase CML at<br/>diagnosis (CP vs<br/>BP)</b> | <b>Morphology<br/>/Phenotype</b> | <b><i>BCR::ABL1</i><br/>Mutations</b> | <b>CNS/EM<br/>involvement</b> |
|----|-------------------------|-----------------------------------------------|--------------------------------------------------|----------------------------------|---------------------------------------|-------------------------------|
| 1  | <b>e1a2</b>             | 40                                            | BP                                               | Lymphoid                         | No                                    | No                            |
| 2  | <b>e1a2</b>             | 44                                            | BP                                               | Lymphoid                         | No                                    | Yes                           |
| 3  | <b>e1a2</b>             | 57                                            | BP                                               | Lymphoid                         | No                                    | Yes                           |
| 4  | <b>e1a2</b>             | 67                                            | CP                                               | Myeloid                          | Yes                                   | No                            |
| 5  | <b>e1a2</b>             | 62                                            | CP                                               | Lymphoid                         | No                                    | No                            |
| 6  | <b>e1a2</b>             | 48                                            | BP                                               | Myeloid                          | No                                    | No                            |
| 7  | <b>e1a2</b>             | 26                                            | BP                                               | Myeloid                          | No                                    | No                            |
| 8  | <b>e6a2</b>             | 74                                            | BP                                               | Myeloid                          | No                                    | Unknown                       |
| 9  | <b>e8a2</b>             | 76                                            | CP                                               | Unknown                          | No                                    | No                            |
| 10 | <b>e19a2</b>            | 53                                            | BP                                               | Myeloid                          | No                                    | Yes                           |
| 11 | <b>e19a2</b>            | 54                                            | BP                                               | Myeloid                          | No                                    | No                            |
| 12 | <b>e13a3</b>            | 60                                            | BP                                               | Lymphoid                         | No                                    | No                            |

CML: chronic myeloid leukemia; CP: chronic phase; BP: blast phase; Y: yes; N: no; CNS: central nervous system; EM: extramedullary manifestation(s)

Supplementary Table 3. Type of treatment administered for first treatment of CML-BP

| Treatment combinations | N (=232)   | N (=145)       | N (=87)              |
|------------------------|------------|----------------|----------------------|
|                        |            | (secondary BP) | ( <i>de novo</i> BP) |
| TKI+Ctx+alloSCT        | 35 (15.1%) | 23 (15.9%)     | 12 (13.8%)           |
| TKI+alloSCT            | 10 (0.4%)  | 7 (4.8%)       | 3 (3.4%)             |
| TKI+Ctx                | 99 (42.7%) | 55 (37.9%)     | 44 (50.6%)           |
| TKI alone              | 49 (21.1%) | 31 (21.4%)     | 18 (20.7%)           |
| TKI+HMA                | 0          | 0              | 0                    |
| TKI+HMA+alloSCT        | 0          | 0              | 0                    |
| TKI+HMA+alloSCT+Ctx    | 0          | 0              | 0                    |
| Ctx alone              | 32 (13.8%) | 22 (15.2%)     | 10 (11.5%)           |
| Ctx+alloSCT            | 2 (0.9%)   | 2 (1.4%)       | 0                    |
| alloSCT alone          | 3 (1.3%)   | 3 (2.1%)       | 0                    |
| Best supportive care   | 2 (0.9%)   | 2 (1.4%)       | 0                    |
| <b>Type of TKI</b>     | <b>N</b>   |                |                      |
| Dasatinib              | 75         | 52             | 23                   |
| Ponatinib              | 31         | 31             | 0                    |
| Imatinib               | 62         | 13             | 49                   |
| Nilotinib              | 19         | 15             | 4                    |
| Bosutinib              | 4          | 3              | 1                    |
| Others*                | 2          | 2              | 0                    |

CML-BP: chronic myeloid leukemia blast phase; TKI: tyrosine kinase inhibitor; Ctx: chemotherapy; alloSCT: allogeneic stem cell transplantation; HMA: hypomethylating agents

\*Others: midostaurin (n = 1), unknown (n=1)

Supplementary Table 4. Type of treatment administered for CML-BP in all treatment lines

| Treatment combinations | N        | N              | N                    |
|------------------------|----------|----------------|----------------------|
|                        |          | (secondary BP) | ( <i>de novo</i> BP) |
| TKI+Ctx+alloSCT        | 109      | 65             | 44                   |
| TKI+alloSCT            | 12       | 8              | 4                    |
| TKI+Ctx                | 69       | 36             | 33                   |
| TKI alone              | 26       | 19             | 7                    |
| TKI+HMA                | 1        | 1              | 0                    |
| TKI+HMA+alloSCT        | 1        | 1              | 0                    |
| TKI+HMA+alloSCT+Ctx    | 6        | 6              | 0                    |
| Ctx alone              | 9        | 9              | 0                    |
| Ctx+alloSCT            | 3        | 2              | 1                    |
| alloSCT alone          | 2        | 2              | 0                    |
| Best supportive care   | 2        | 2              | 0                    |
| <b>Type of TKI</b>     | <b>N</b> |                |                      |
| Dasatinib              | 133      | 76             | 57                   |
| Ponatinib              | 95       | 69             | 26                   |
| Imatinib               | 80       | 19             | 61                   |
| Nilotinib              | 46       | 30             | 16                   |
| Bosutinib              | 19       | 13             | 6                    |
| Others*                | 16       | 13             | 3                    |

CML-BP: chronic myeloid leukemia blast phase; TKI: tyrosine kinase inhibitor; Ctx: chemotherapy; alloSCT: allogeneic stem cell transplantation; HMA: hypomethylating agents

\*Others: asciminib (n = 14), PF-114 (n = 1), midostaurin (n = 1)
